# Supplementary material for: Temporal variation in glacier snowpack bacterial communities mediated by nitrogen
Source: Copernicus journal article supplement (doi:10.5194/tc-2021-215), 2021-08-12
Supplement: Supplementary file 1 [file tc-2021-215-supplement.pdf]

# Temporal variation in glacier snowpack bacterial communities mediated by nitrogen

Yuying Chen<sup>1,4</sup>, Keshao Liu<sup>1,4</sup>, Yongqin Liu<sup>1,2,4</sup>, Trista J. Vick-Majors<sup>3</sup>, Feng Wang<sup>1,4</sup>, Mukan Ji<sup>2</sup>

<sup>1</sup>State Key Laboratory of Tibetan Plateau Earth System, Resources and Environment (TPESRE), Institute of Tibetan Plateau Research, Chinese Academy of Sciences, Beijing 100101, China

<sup>2</sup>Center for the Pan-third Pole Environment, Lanzhou University, Lanzhou 730000, China

<sup>3</sup>Department of Biological Sciences, Great Lakes Research Center, Michigan Technological University, Houghton, Michigan 49931, United States

<sup>4</sup>University of Chinese Academy of Sciences, Beijing 100049, China

*Correspondence to:* Mukan Ji (jimk@lzu.edu.cn)

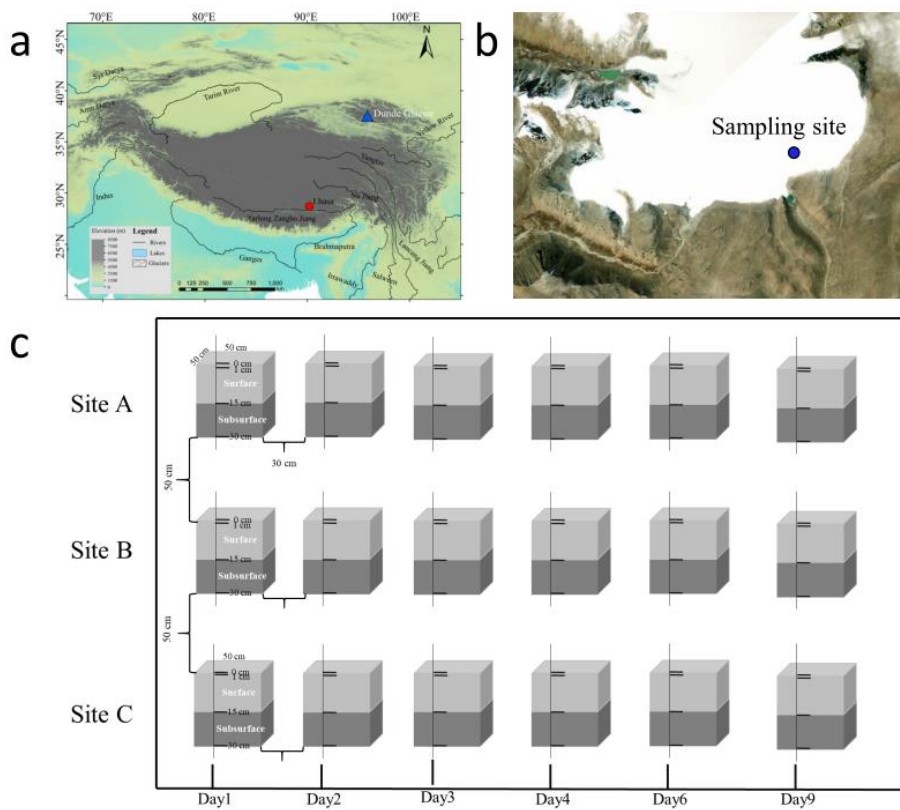

Fig S1 Geographic location of the Dunde glacier (a and b) and schematic of sampling design (c).

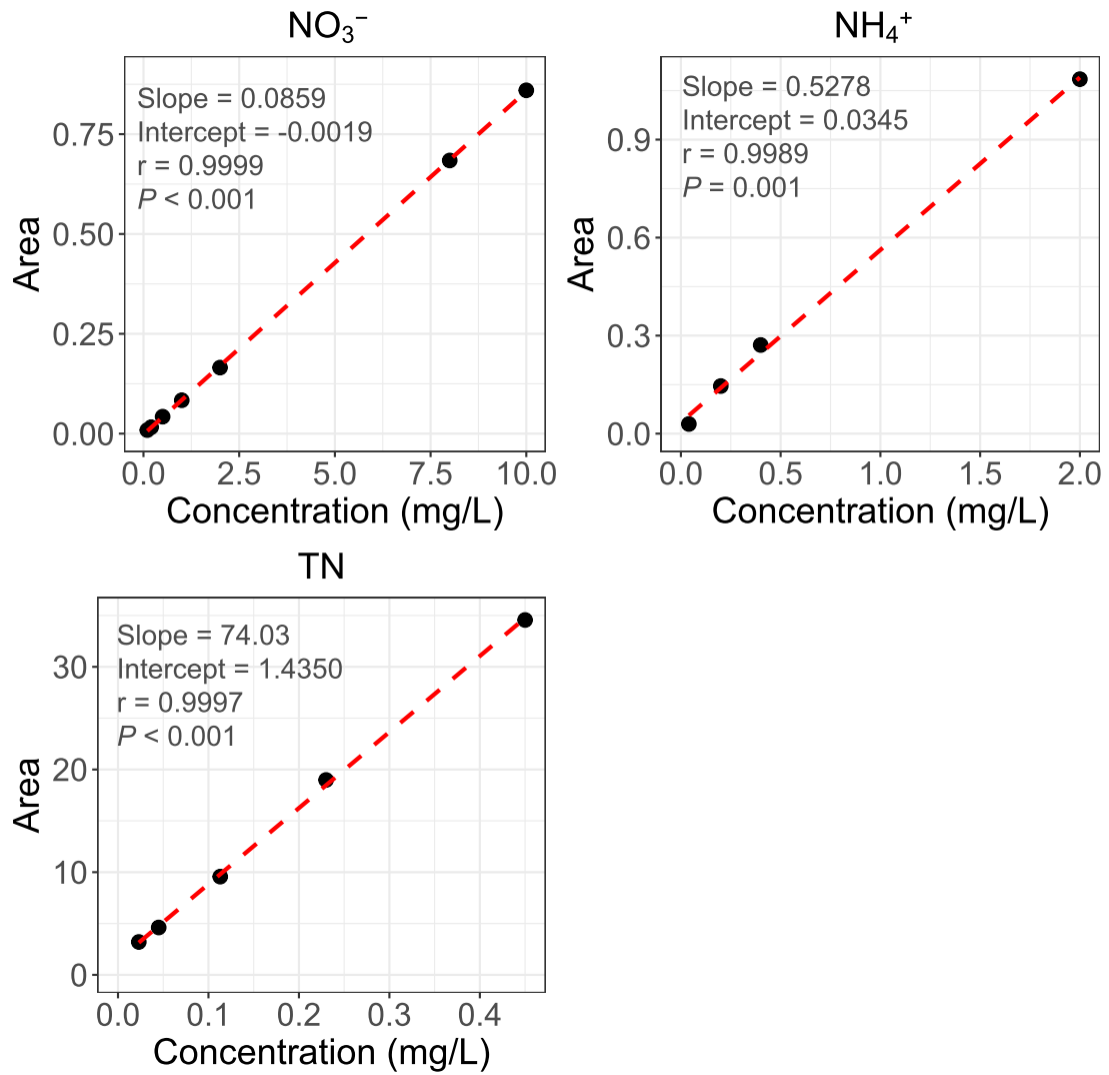

Fig S2 Standard curve of NO<sub>3</sub><sup>-</sup>, NH<sub>4</sub><sup>+</sup> ions, and TN. The x-axis is the concentration of the standard sample; the y-axis represents the peak area. Significance is based on Pearson correlations.

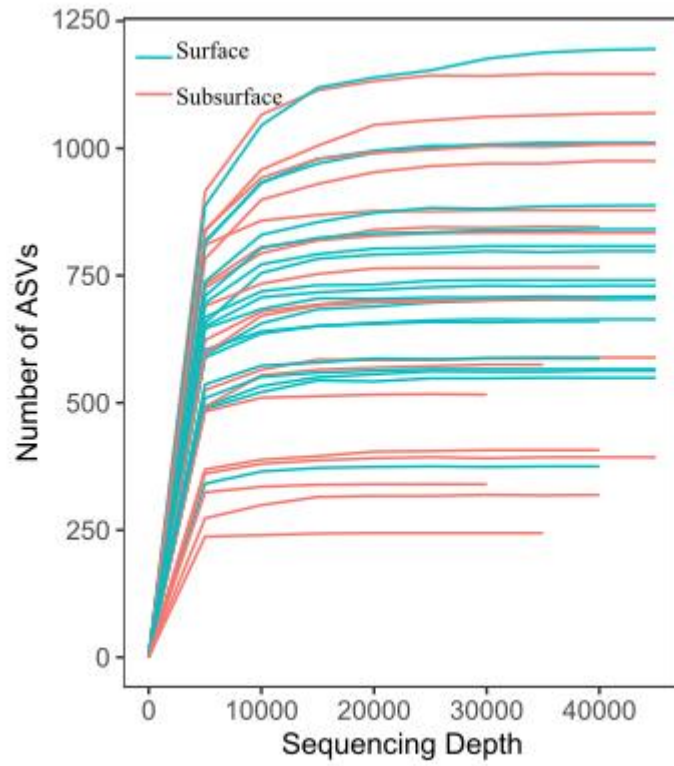

Fig S3 Rarefaction curves for each sample, relating the number of ASVs detected as a function of the sequencing effort, indicating that existing diversity was likely covered by the sequencing effort.

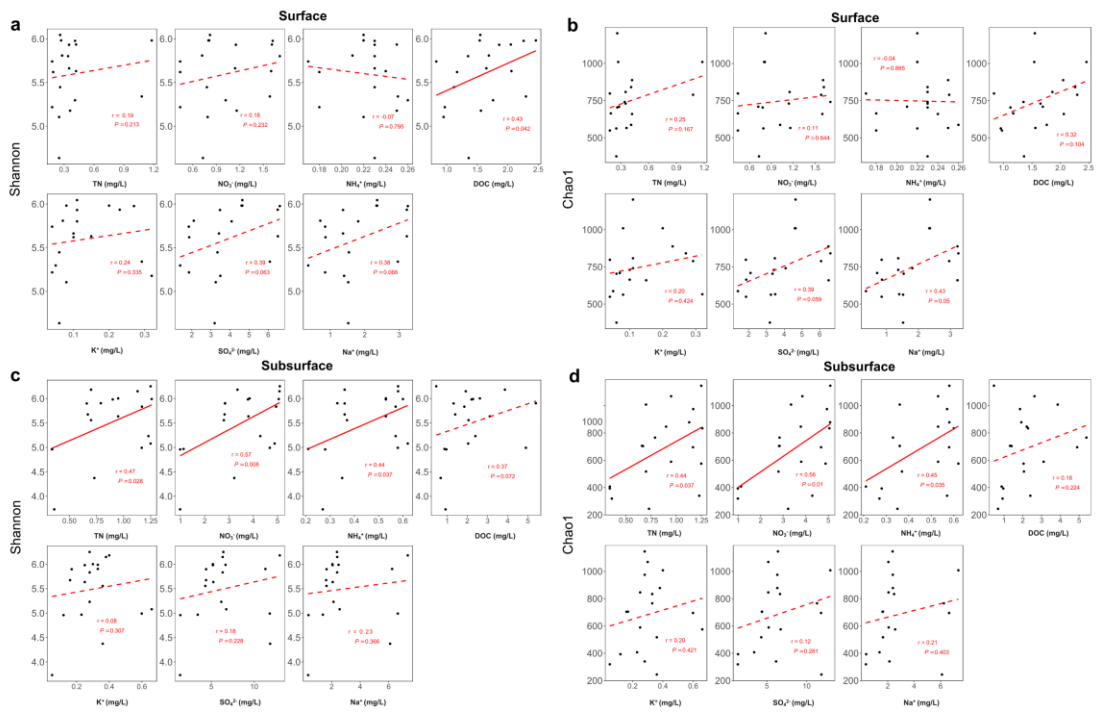

Fig S4 The influence of environmental factors on bacterial diversity. Correlations of Shannon (a, c) and Chao1 (b, d) diversity index with environmental factors in the surface and subsurface layers. Each dot represents an individual sample. The solid and dashed lines indicate significant and nonsignificant changes respectively. Significance is based on Pearson correlations.

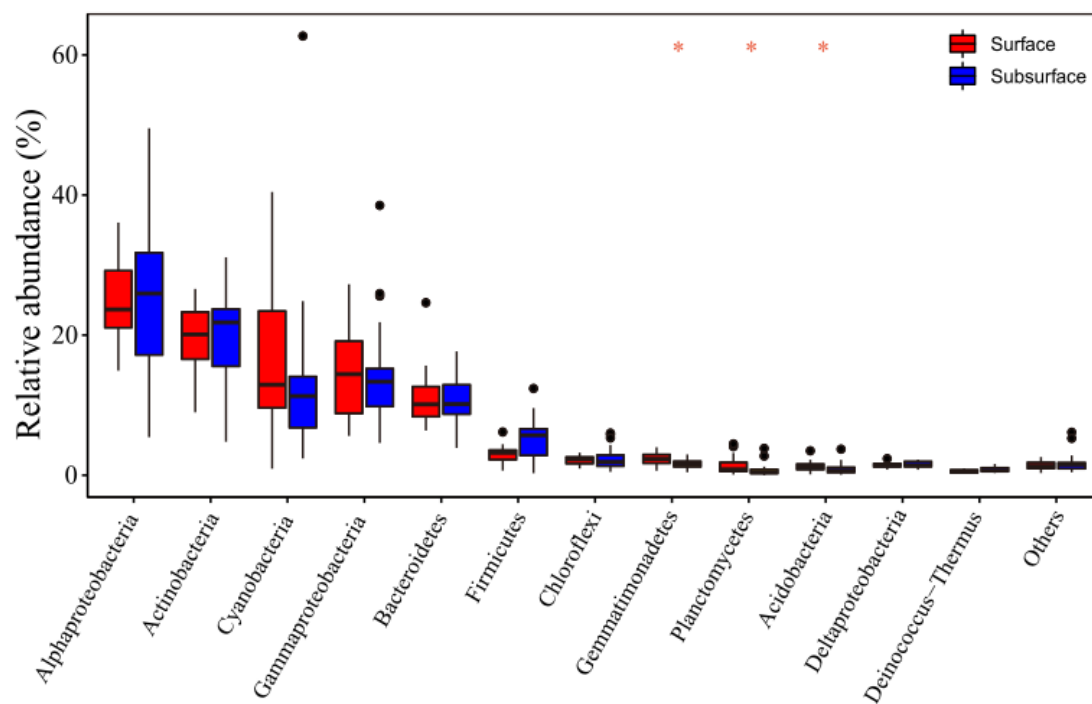

Fig S5 Relative abundances of the dominant (average relative abundance > 1%) bacterial phyla (Proteobacteria is further classified at the class-level) across the surface and subsurface layers. Statistical significance is indicated by  $*P < 0.05$  based on Wilcoxon rank-sum test.

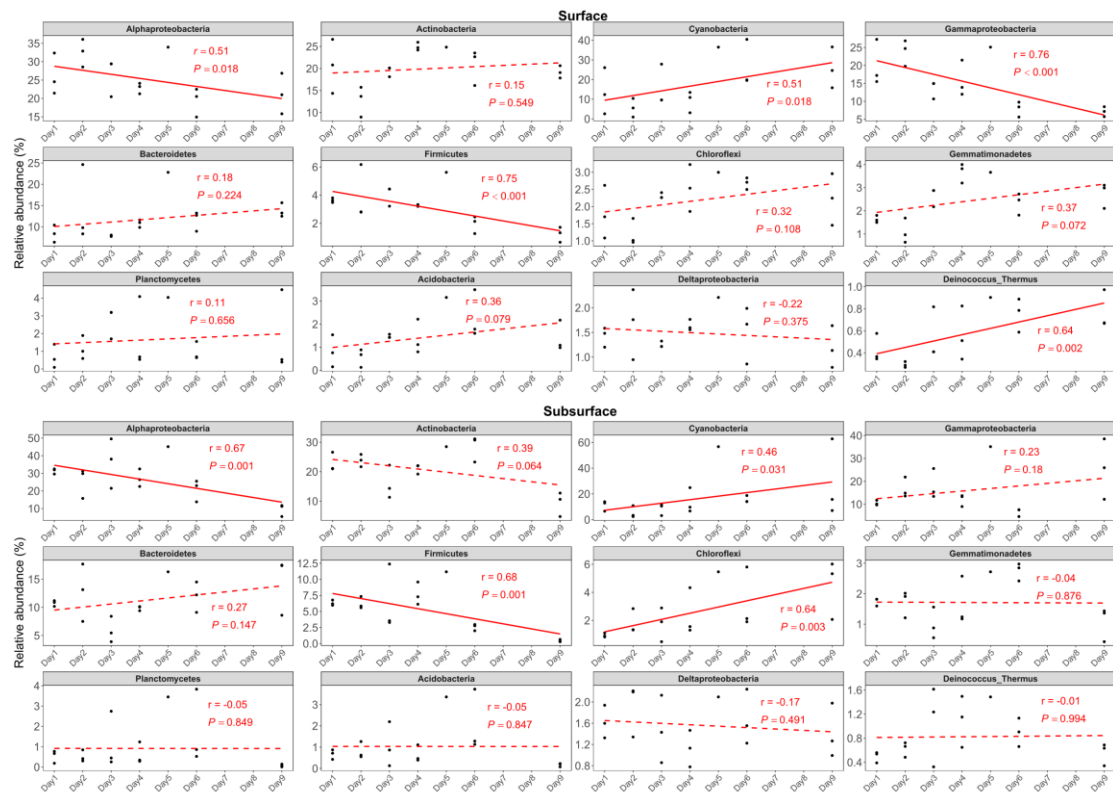

Fig S6 Temporal changes of the dominant bacterial phyla in the surface and subsurface snow layers. Each dot represents an individual sample. The solid and dashed lines indicate significant and nonsignificant changes, respectively. Significance is based on Pearson correlations.

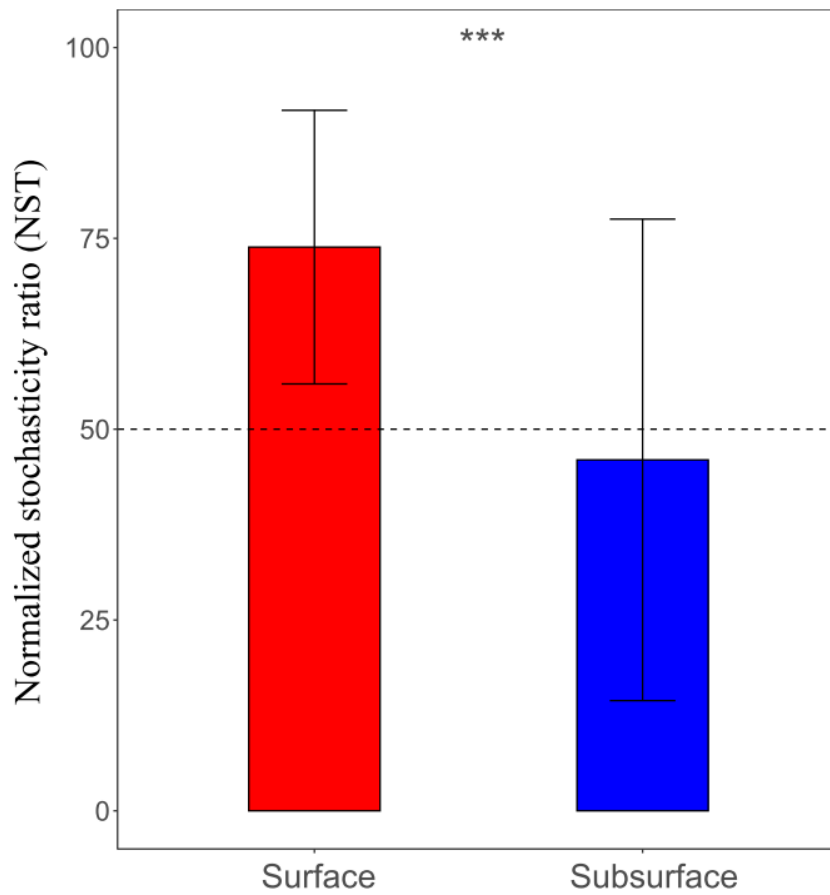

Fig S7 Normalized stochasticity (NST) ratios estimated for the bacterial community in the surface and subsurface layers. Bar plots shows the comparison of NST between the surface and subsurface bacterial communities. Stars indicate significance at  $P < 0.001$ . The contribution of stochasticity was significantly higher in the surface layer than in the subsurface layer. The contribution of stochasticity was higher and lower than 50% in the surface and the subsurface layer indicating that the community assembly processes are dominated by stochasticity and determinism, respectively.



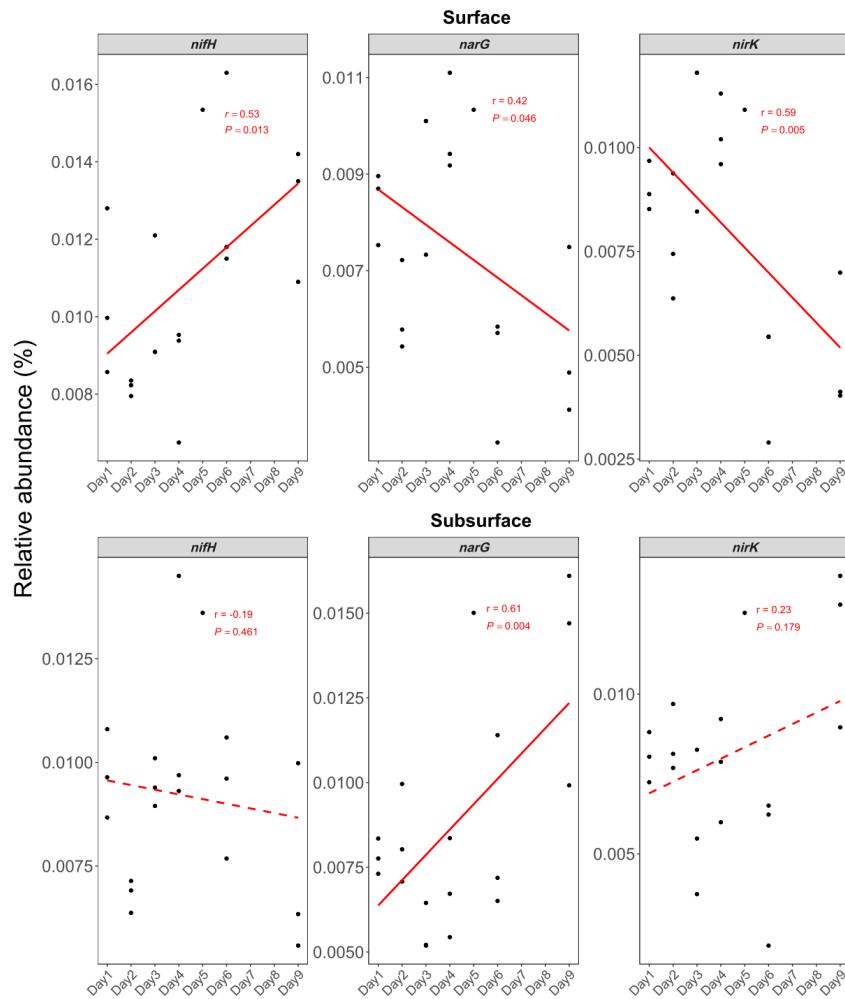

Fig S8. The temporal changes of the relative abundance of nitrogen-cycle related genes in the surface and subsurface layers. The solid and dashed lines indicate significant and nonsignificant changes (based on Pearson correlations), respectively. For the surface layer, the relative abundance of *nifH* gene significantly increases with time, while the relative abundance of *narG* and *nirK* genes significantly decreases with time. In the subsurface layer, the relative abundance of *nifH* gene exhibits no significant change with time, while the relative abundance of *narG* and *nirK* genes significantly and nonsignificantly increase with time, respectively.

Table S1 physiochemical parameters of the snow samples in the surface and subsurface layer.

| Depth      | Time | Sample name <sup>a</sup> | DOC (mg/L) | TN (mg/L) <sup>b</sup> | NO <sub>3</sub> <sup>-</sup> (mg/L) <sup>b</sup> | NH <sub>4</sub> <sup>+</sup> (mg/L) <sup>b</sup> | K <sup>+</sup> (mg/L) <sup>b</sup> | SO <sub>4</sub> <sup>2-</sup> (mg/L) <sup>b</sup> | Na <sup>+</sup> (mg/L) |
|------------|------|--------------------------|------------|------------------------|--------------------------------------------------|--------------------------------------------------|------------------------------------|---------------------------------------------------|------------------------|
| Surface    | Day1 | D1.1s                    | 0.97       | 0.18                   | 0.44                                             | 0.18                                             | 0.04                               | 1.85                                              | 0.85                   |
|            |      | D1.2s                    | 1.17       | 0.19                   | 0.44                                             | 0.18                                             | 0.10                               | 1.86                                              | 0.86                   |
|            |      | D1.3s                    | 0.83       | 0.18                   | 0.44                                             | 0.17                                             | 0.04                               | 1.84                                              | 0.85                   |
|            | Day2 | D2.1s                    | 0.95       | 0.25                   | 0.79                                             | 0.22                                             | 0.08                               | 3.25                                              | 1.52                   |
|            |      | D2.2s                    | 1.12       | 0.26                   | 0.78                                             | 0.23                                             | 0.06                               | 3.34                                              | 1.54                   |
|            |      | D2.3s                    | 1.36       | 0.25                   | 0.73                                             | 0.23                                             | 0.06                               | 3.19                                              | 1.52                   |
|            | Day3 | D3.1s                    | 2.46       | 1.18                   | 0.81                                             | 0.22                                             | 0.20                               | 4.64                                              | 2.36                   |
|            |      | D3.2s                    | 1.55       | 0.26                   | 0.82                                             | 0.22                                             | 0.11                               | 4.64                                              | 2.36                   |
|            |      | D3.3s                    | 1.54       | 0.27                   | 0.80                                             | 0.22                                             | 0.08                               | 4.60                                              | 2.34                   |
|            | Day4 | D4.1s                    | 2.26       | 0.41                   | 1.62                                             | 0.23                                             | 0.27                               | 6.60                                              | 3.25                   |
|            |      | D4.2s                    | 2.05       | 0.42                   | 1.61                                             | 0.25                                             | 0.23                               | 6.49                                              | 3.22                   |
|            |      | D4.3s                    | 2.06       | 0.42                   | 1.60                                             | 0.24                                             | 0.15                               | 6.50                                              | 3.22                   |
|            | Day6 | D6.1s                    | 1.35       | 0.34                   | 1.71                                             | 0.23                                             | 0.11                               | 4.08                                              | 1.81                   |
|            |      | D6.2s                    | 1.69       | 0.28                   | 0.72                                             | 0.21                                             | 0.07                               | 2.10                                              | 0.71                   |
|            |      | D6.3s                    | 1.76       | 0.41                   | 1.02                                             | 0.26                                             | 0.05                               | 1.39                                              | 0.36                   |
|            | Day9 | D9.1s                    | 1.65       | 0.35                   | 1.14                                             | 0.23                                             | 0.10                               | 3.42                                              | 1.37                   |
|            |      | D9.2s                    | 1.86       | 0.35                   | 1.15                                             | 0.23                                             | 0.11                               | 3.47                                              | 1.37                   |
|            |      | D9.3s                    | 1.56       | 0.36                   | 1.16                                             | 0.25                                             | 0.32                               | 3.49                                              | 1.40                   |
| Subsurface | Day1 | D1.1ss                   | 2.21       | 0.90                   | 3.78                                             | 0.53                                             | 0.25                               | 5.18                                              | 2.06                   |
|            |      | D1.2ss                   | 2.62       | 0.95                   | 3.85                                             | 0.53                                             | 0.30                               | 5.18                                              | 2.05                   |
|            |      | D1.3ss                   | 3.11       | 0.95                   | 3.80                                             | 0.53                                             | 0.25                               | 5.23                                              | 2.07                   |
|            | Day2 | D2.1ss                   | 1.85       | 1.17                   | 4.94                                             | 0.57                                             | 0.28                               | 6.32                                              | 2.38                   |
|            |      | D2.2ss                   | 1.92       | 1.13                   | 5.08                                             | 0.58                                             | 0.38                               | 6.32                                              | 2.39                   |
|            |      | D2.3ss                   | 0.46       | 1.25                   | 5.09                                             | 0.58                                             | 0.28                               | 6.40                                              | 2.37                   |
|            | Day3 | D3.1ss                   | 2.28       | 1.26                   | 5.05                                             | 0.60                                             | 0.33                               | 6.66                                              | 2.48                   |
|            |      | D3.2ss                   | 2.04       | 1.25                   | 4.88                                             | 0.62                                             | 0.66                               | 6.74                                              | 2.56                   |
|            |      | D3.3ss                   | 2.40       | 1.23                   | 4.29                                             | 0.57                                             | 0.28                               | 6.16                                              | 2.13                   |
|            | Day4 | D4.1ss                   | 1.32       | 0.66                   | 2.84                                             | 0.36                                             | 0.17                               | 4.39                                              | 1.64                   |
|            |      | D4.2ss                   | 2.06       | 0.70                   | 2.79                                             | 0.37                                             | 0.36                               | 4.30                                              | 1.64                   |
|            |      | D4.3ss                   | 1.40       | 0.67                   | 2.82                                             | 0.36                                             | 0.16                               | 4.38                                              | 1.61                   |
|            | Day6 | D6.1ss                   | 3.86       | 0.70                   | 3.35                                             | 0.36                                             | 0.40                               | 12.98                                             | 7.34                   |
|            |      | D6.2ss                   | 5.39       | 0.79                   | 2.84                                             | 0.33                                             | 0.33                               | 11.31                                             | 6.24                   |
|            |      | D6.3ss                   | 0.68       | 0.73                   | 3.22                                             | 0.35                                             | 0.36                               | 11.86                                             | 6.10                   |
|            | Day9 | D9.1ss                   | 0.92       | 0.36                   | 0.99                                             | 0.27                                             | 0.05                               | 1.36                                              | 0.35                   |
|            |      | D9.2ss                   | 0.87       | 0.34                   | 1.13                                             | 0.21                                             | 0.23                               | 3.41                                              | 1.38                   |
|            |      | D9.3ss                   | 0.96       | 0.34                   | 0.99                                             | 0.28                                             | 0.12                               | 1.38                                              | 0.37                   |

<sup>a</sup>. The "s" and "ss" suffix after the name of sampling represented surface and subsurface snow layers, respectively.

<sup>b</sup>. The environmental parameters exhibits significant difference between the surface and subsurface snow layers.

Table S2 Topological properties comparison between empirical and random networks for the bacterial communities in surface and subsurface snow layers.

|                                        | Empirical Network |            | Random Network |            |
|----------------------------------------|-------------------|------------|----------------|------------|
|                                        | Surface           | Subsurface | Surface        | Subsurface |
| Modularity                             | 0.65              | 0.40       | 0.43±0.008     | 0.27±0.029 |
| Connectedness (Con)                    | 0.71              | 0.86       | 0.39±0.035     | 0.97±0.007 |
| Transitivity (Trans)                   | 0.45              | 0.49       | 0.05±0.010     | 0.23±0.010 |
| Density (D)                            | 0.02              | 0.06       | 0.02±0.000     | 0.06±0.000 |
| Average clustering coefficient (avgCC) | 0.31              | 0.39       | 0.05±0.010     | 0.18±0.015 |
| Average path distance (GD)             | 5.51              | 4.72       | 3.44±0.055     | 2.73±0.048 |
