# Supplementary material for: Temporal variation in glacier snowpack bacterial communities mediated by nitrogen
Source: Copernicus journal article supplement (doi:10.5194/tc-2021-215), 2021-08-12
Supplement: Supplementary file [file tc-2021-215-AC1-supplement.pdf]

**We thank Anonymous Referee #1 for their considered, detailed, and helpful review of our manuscript. Below we present our point-by-point responses.**

**Question 1.** Line 17 – word ‘sub’ missing I believe. Same sentence starting ‘Our results’ mixes past and present tense.

**Response:**

We apologize for the mistake. The spelling and the sentence have been changed to past tense.

Original manuscript:

Our results revealed dynamic bacterial communities in both surface and surface snow, and nitrogen is the key determinant of bacterial diversity, composition, community structure, and biotic interactions.

Amended manuscript (Lines 19-21):

Our results revealed rapid temporal changes in nitrogen (including nitrate and ammonium) and bacterial communities in both surface and subsurface snow.

**Question 2.** Line 18 – sentence starting ‘Nitrate and ammonium’...this first part of this sentence is pretty vague – can you improve this with some data values please (or at least proportional change information).

**Response:**

We thank for this comment. The actual numbers have been added.

Original manuscript:

Nitrate and ammonium concentration increased and decreased in the surface and subsurface snow over time, therefore indicating accumulation and consumption processes, respectively.

Amended manuscript (Lines 21-24):

Nitrate and ammonium concentrations increased from 0.44 to 1.15 mg/L and 0.18 to 0.24 mg/L in the surface snow and decreased from 3.81 to 1.04 mg/L and 0.53 to 0.25 mg/L in the subsurface snow over time, therefore indicating accumulation and

consumption processes, respectively.

**Question 3.** Line 21 – sentence starting ‘The nitrogen limitation’ ... place into past tense and remove ‘the’ throughout for clarity... e.g. ‘Nitrogen limitation and dominance of denitrification in subsurface snow suggested stronger environmental and biotic filtering processes than in surface snow.’

**Response:**

We thank for this comment. The grammar mistake has been corrected as suggested.

Original manuscript:

The nitrogen limitation and the apparent dominance of the denitrification in the subsurface snow suggest stronger environmental and biotic filtering than those in the surface snow.

Amended manuscript (Lines 27-31):

The nitrogen limitation and enriched denitrification-related genes in subsurface snow suggested stronger environmental and biotic filtering than those in surface snow, which may explain the lower bacterial diversity, more pronounced community temporal changes, and stronger biotic interactions.

**Question 4.** Line 24: Sentence starting ‘Collectively’ – place into present tense and change ‘revealed’ to ‘provides insight into nitrogen metabolism...’

**Response:**

We thank for this comment. The grammar mistakes have been corrected as suggested.

Original manuscript:

Collectively, these findings significantly advanced our understanding of microbial community variations and bacterial interactions after snow deposition, and revealed the dynamics of nitrogen metabolism in Tibetan snow.

Amended manuscript (Lines 30-32):

Collectively, these findings advance our understanding of bacterial community variations and bacterial interactions after snow deposition and provide a possible biological explanation for nitrogen dynamics in snow.

## **Introduction**

**Question 5.** Lines 28 – 38: There is a mix of snow and glacier related information up front here (lines 28 – 38) – ie. Glaciers melting, and glacier ice being oligotrophic, but then snow related bacterial communities. I think it important to make clear the environment you are working with (presumably supraglacial snowpacks) and try to not mix information between snow and glacier ice itself, which also houses diverse autotrophic and heterotrophic populations that undertake significant biogeochemical cycling of carbon and major nutrients.

### **Response:**

We thank for the comment, and we have rewritten the first paragraph of the introduction and the manuscript now focuses only on the supraglacial snow to ensure the information is clear to the readers.

### [Amended manuscript \(Lines 35-47\):](#)

Global warming accelerates glacier melting across the globe, supraglacial snow is particularly vulnerable (Hodson et al., 2008) with the carbon and nitrogen stored being released into downstream ecosystems in meltwaters (Wadham et al., 2019; Hodson et al., 2005). The composition and abundance of nutrients in supraglacial snows are regulated by glacier-dwelling microorganisms (Hodson et al., 2008). A range of metabolically active bacteria have been reported in supraglacial snow, including Bacteroidetes, Actinobacteria, Firmicutes, and Alphaproteobacteria (Miteva, 2008; Maccario et al., 2019; Carey et al., 2016; Lazzaro et al., 2015; Michaud et al., 2014). These microorganisms perform key ecological functions in biogeochemical cycling such as carbon and nitrogen fixation, which are vital to the nutrient-limited supraglacial ecosystem. Changes in their community composition and activities will influence the dynamics of nutrient storage, transformation, and release. Thus, it is crucial to understand how the bacterial community in supraglacial snow changes across time and to determine whether those changes are associated with the temporal nutrient dynamics in snow.

**Question 6.** Lines 39 - 46: again, I think you need to be more explicit here that you are presumably talking about precipitation in the ablation zone of glaciers....i.e. snow fall that ablates in the subsequent melt season as opposed to that which is accumulated and eventually turned into glacial ice.

**Response:**

We thank for the comment. In our study, we attempted to reveal the dynamics of nutrients and bacterial community in supraglacial snow of fresh snow across a short temporal scale. Previous studies have investigated nutrients and microbial community structure changes across the entire ablation period or seasonal changes, such as Larose et al. (2013)<sup>1</sup> revealed that the form of nitrogen varied as a function of time in supraglacial snow during a two-month field study at the Svalbard, Norway. However, several snowfall events would be expected in those studies. Thus, the observations could be an accumulation effect, whereas focusing on fresh snow after a single snowfall is still yet elusive. We apologize for not stating the aim of our study clear enough, and we have amended the introduction to emphasize the aim of our study.

1. Larose, C., Dommergue, A., and Vogel, T. M.: Microbial nitrogen cycling in Arctic snowpacks, *Environmental Research Letters*, 8, 035004, 10.1088/1748-9326/8/3/035004, 2013

[Amended manuscript \(Lines 50-63\):](#)

Several studies investigated the dynamics of nutrient and bacterial changes in supraglacial snow during the ablation period. Larose et al. (2013a) revealed that the form of nitrogen varied as a function of time in supraglacial snow during a two-month field study at the Svalbard, Norway and fluctuations in microbial community structure have been reported with the relative abundance of fungi and bacteria (such as Bacteroidetes and Proteobacteria) increased and decreased, relatively. Seasonal shifts in snowpack bacterial communities have also been reported in the mountain snow in Japan, rapid microbial growth was observed with increasing snow temperature and meltwater content (Segawa et al., 2005). However, the results of these studies are likely the consequence of these several precipitation events due to the long period of time. During precipitation, a new snow layer forms above the previous ones, which is

responsible for the stratified snowpack structure. These different snow layers have distinct physical and chemical characteristics and their age also differed substantially (Lazzaro et al., 2015). Thus, the microbial process across the aged snowpack could be complex, whereas focusing on supraglacial snow from a single snowfall event could provide unique insights into the bacterial and nutrient dynamics. Hell et al. (2013) reported bacterial community structure changes during the ablation period across five days in the high Arctic, while the bacterial and nutrient dynamics during the snow accumulation period remain elusive.

**Question 7.** The description of dominant groups is limited here – Cyanobacteria were shown by Carey et al. 2016 to dominate the surface (0-15cm) of a sub-Alpine snowpack based on 16S sequencing, but it is widely known that numerous eukaryotic microalgae can dominate surface snow on and off glaciers. Please expand this information to include the suite of microbial communities that are known to dominate snowpacks or alternatively change the wording throughout to focus only on bacterial communities as opposed to ‘microbial communities.

**Response:**

We appreciate the reviewer for raising this concern. This paper only focuses on bacterial communities, so we have changed the word to “bacterial communities” instead of “microbial communities”.

[Amended manuscript \(Lines 64-70\):](#)

Surface and subsurface typically have distinct bacterial community structures due to the environmental filtering from the vertical profile of temperature, solar radiation intensity, and nutrients (Xiang et al., 2009; Møller et al., 2013; Carey et al., 2016). For example, Cyanobacteria tend to dominate upper snow layers (0-15 cm) (Carey et al., 2016), while their relative abundance is greatly reduced in the deeper snow layer (Xiang et al., 2009). This is likely due to the lower light intensity in the deeper snow, which favors heterotrophic bacteria such as the Actinobacteria and Firmicutes. Differences in physicochemical conditions can also indirectly influence bacterial community structure through impacts on the types of biotic interactions that dominate an environment (Friedman and Gore, 2017; Khan et al., 2018; Bergk Pinto et al., 2019). For example,

the addition of organic carbon shifted bacterial interactions from collaboration to competition in Arctic snow (Bergk Pinto et al., 2019). In comparison, intensive collaboration can enhance complex organic carbon degradation and mineralization, which are particularly important for oligotrophic environments such as glaciers (Krug et al., 2020). Collaboration is also known to be essential to biological processes such as ammonia oxidation and denitrification, in which various organisms carry out different steps of these processes (Henry et al., 2005; Madsen, 2011; Yuan et al., 2021). These changes in interactions and network complexity can favor or disadvantage certain bacterial groups, thereby changing the bacterial community structure (i.e., biofiltering).

**Question 8.** I find the sentences at the end of this paragraph contradicting. You state that differences in physiochemical conditions shape community structure (with the previous example of cyanos in surface and not in subsurface snow), but then state whether microbes in different snowpack layers show similar responses to environmental selection is still largely unknown. Can you clarify this please?

**Response:**

Thank you for your comment The sentence at the end of the paragraph intended to propose that whether the different microbial communities will have distinct microbial functions is largely unknown. We have amended the sentence to correct this.

[Amended manuscript \(Lines 59-61\):](#)

Thus, the microbial process across the aged snowpack could be complex, whereas focusing on supraglacial snow from a single snowfall event could provide unique insights into the bacterial and nutrient dynamics.

**Question 9.** Lines 56 – 60: add “The” before ‘Tibetan Plateau’ in the first sentence please.

**Response:**

We thank for this comment, the grammar mistake has been corrected as indicated.

[Original manuscript:](#)

Tibetan Plateau is the world’s third-largest ice reservoir, after those in Antarctica and Greenland (Qiu, 2012).

Amended manuscript (Line 81):

The Tibetan Plateau is the world's third-largest ice reservoir, after those in Antarctica and Greenland (Qiu, 2012).

**Question 10.** Line 58 sentence starting 'The glacier melting' – this is a very vague statement with no references...can you please add details and appropriate references to evidence this.

**Response:**

We thank for this comment. We have added details and appropriate references to evidence this.

Original manuscript:

Tibetan Plateau is the world's third-largest ice reservoir, after those in Antarctica and Greenland (Qiu, 2012). It is warming at a rate twice of the global average (Chen et al., 2015), causing rapid shrinkage of glaciers and snow (Rauscher et al., 2007; Hall and Fagre, 2003). The glacier melting leads to the enhanced discharge of microorganisms and nutrients into downstream aquatic and terrestrial ecosystems, which makes an impact on their biogeochemical processes.

Amended manuscript (Lines 81-86):

The Tibetan Plateau is the world's third-largest ice reservoir, after those in Antarctica and Greenland (Qiu, 2012). It is warming at a rate twice the global average (Chen et al., 2015), and 95% of the Tibetan glaciers retreated between 1990 to 2005 (Rauscher et al., 2007; Hall and Fagre, 2003; Yao et al., 2007). Glacier melting increases the discharge of microorganisms and nutrients in meltwater into downstream aquatic ecosystems (Kohler et al., 2020), which substantially impacts the bacterial community and biogeochemical processes (Liu et al., 2021).

**Question 11.** I would recommend to blend this paragraph with the subsequent paragraph and add in references to sentences where needed (e.g. ablation zone microbes having a greater impact on downstream processes).

**Response:**

We thank the reviewer for this constructive comment. We have blended this paragraph with the subsequent paragraph and have rewritten our research purpose as follows.

[Amended manuscript \(Lines 81-99\):](#)

The Tibetan Plateau is the world's third-largest ice reservoir, after those in Antarctica and Greenland (Qiu, 2012). It is warming at a rate twice the global average (Chen et al., 2015), and 95% of the Tibetan glaciers retreated between 1990 to 2005 (Rauscher et al., 2007; Hall and Fagre, 2003; Yao et al., 2007). Glacier melting increases the discharge of microorganisms and nutrients in meltwater into downstream aquatic ecosystems (Kohler et al., 2020), which substantially impacts the bacterial community and biogeochemical processes (Liu et al., 2021). Thus, it is crucial to understand the transformation processes of the bacterial community and nutrients in the supraglacial snow. Several studies have investigated the nutrient and bacterial community changes in supraglacial snow across the winter (Brooks et al., 1998; Liu et al., 2006), but the bacterial and nutrient dynamics of freshly fallen snow have been largely overlooked. These short temporal changes will influence the following post-depositional processes after it is buried by the next snowfall, and will ultimately determine the physicochemical properties of the stratified snow in the following year. In the present study, we investigated the bacterial community and snow physiochemical property changes in the surface and subsurface supraglacial snow during a nine-day period after a single snowfall event at the Dunde Glacier on the northeast of the Tibetan Plateau. We aimed to answer the following key questions: 1) do the bacterial community and nutrient changes in a short temporal scale, 2) do the bacterial communities in different snow layers exhibit similar community temporal changes, and 3) are the temporal changes in the surface and subsurface snow related to environmental filtering, biotic interactions, or both?

**Question 12.** The research questions seem sound but you have a strong emphasis on temporal changes, and are only monitoring here for 9 days – arguably a very small time slice of a snowpack's melt period. How will this limited data be representative of larger temporal patterns?



**Response:**

We appreciate the reviewer for raising this concern. We agree that a nine days observation cannot reflect the nutrient changes for the entire snowmelt period. We have narrowed the scope of the present study, and focus only on the bacterial and nutrient changes from a single snowfall event across a short temporal scale, which has rarely been investigated. We have added a paragraph to introduce the knowledge gap in bacterial and nutrient dynamics in supraglacial snow over a short temporal scale, and rephrase the scientific questions to reflect this.

[Amended manuscript \(Lines 50-63\):](#)

Several studies investigated the dynamics of nutrient and bacterial changes in supraglacial snow during the ablation period. Larose et al. (2013a) revealed that the form of nitrogen varied as a function of time in supraglacial snow during a two-month field study at the Svalbard, Norway and fluctuations in microbial community structure have been reported with the relative abundance of fungi and bacteria (such as Bacteroidetes and Proteobacteria) increased and decreased, relatively. Seasonal shifts in snowpack bacterial communities have also been reported in the mountain snow in Japan, rapid microbial growth was observed with increasing snow temperature and meltwater content (Segawa et al., 2005). However, the results of these studies are likely the consequence of these several precipitation events due to the long period of time. During precipitation, a new snow layer forms above the previous ones, which is responsible for the stratified snowpack structure. These different snow layers have distinct physical and chemical characteristics and their age also differed substantially (Lazzaro et al., 2015). Thus, the microbial process across the aged snowpack could be complex, whereas focusing on supraglacial snow from a single snowfall event could provide unique insights into the bacterial and nutrient dynamics. Hell et al. (2013) reported bacterial community structure changes during the ablation period across five days in the high Arctic, while the bacterial and nutrient dynamics during the snow accumulation period remain elusive.

[And \(Lines 83-99\)](#)

Glacier melting increases the discharge of microorganisms and nutrients in meltwater into downstream aquatic ecosystems (Kohler et al., 2020), which substantially impacts the bacterial community and biogeochemical processes (Liu et al., 2021). Thus, it is crucial to understand the transformation processes of the bacterial community and nutrients in the supraglacial snow. Several studies have investigated the nutrient and bacterial community changes in supraglacial snow across the winter (Brooks et al., 1998; Liu et al., 2006), but the bacterial and nutrient dynamics of freshly fallen snow have been largely overlooked. These short temporal changes will influence the following post-depositional processes after it is buried by the next snowfall, and will ultimately determine the physicochemical properties of the stratified snow in the following year. In the present study, we investigated the bacterial community and snow physiochemical property changes in the surface and subsurface supraglacial snow during a nine-day period after a single snowfall event at the Dunde Glacier on the northeast of the Tibetan Plateau. We aimed to answer the following key questions: 1) do the bacterial community and nutrient changes in a short temporal scale, 2) do the bacterial communities in different snow layers exhibit similar community temporal changes, and 3) are the temporal changes in the surface and subsurface snow related to environmental filtering, biotic interactions, or both?

## **Methods**

**Question 13.** Line 71 – remove ‘the’ before October.

### **Response:**

The grammar mistake has been corrected.

### Original manuscript:

Snow samples were collected from the ablation zone at Dunde glacier (38°06'N, 96°24'E, 5325 m above the sea-level), during the October and November, 2016 (Supplementary Fig S1).

### Amended manuscript (Lines 102-103):

Snow samples were collected from the ablation zone at Dunde glacier (38°06'N, 96°24'E, 5325 m above the sea-level), during October and November, 2016

(Supplementary Fig. S1).

**Question 14.** Line 74 – OK, so actually not daily sampling, but spread over nine days. Also, your dates and day numbers don't match – you have 6 dates that you list, and 7 'days' that you list....

**Response:**

We apologize for the misunderstanding. There was a typo in the original sentence, and this has been corrected.

Original manuscript:

Sampling was conducted over a nine-day period (on the 24<sup>th</sup>, 25<sup>th</sup>, 26<sup>th</sup>, 27<sup>th</sup>, and 29<sup>th</sup> of October, and the 2<sup>nd</sup> November, which are referred as day 1, 2, 3, 4, 5, 6, and 9 thereafter).

Amended manuscript (Lines 107-110):

Snow samples were collected on the 24<sup>th</sup>, 25<sup>th</sup>, 26<sup>th</sup>, 27<sup>th</sup>, and 29<sup>th</sup> of October, and the 2<sup>nd</sup> November (which are referred as day 1, 2, 3, 4, 6, and 9) until the next snowfall started.

**Question 15.** Line 75: sampling during October and November presumably means recently deposited snow, i.e. snow from the start of the autumn/winter season. Thus you are sampling relatively fresh snow, rather than e.g. snow just before the start of the next melt season, ie. the snow that would be released into the (downstream) environment. How are these data then reflective of the type of microbial communities and biogeochemistry that are important for downstream ecosystems as asserted earlier in the manuscript? Will the communities and nutrient load not continue to change significantly throughout the whole autumn/winter/spring season until the onset of melt? This links back to my previous question on whether a 9-day sampling period is big enough to address the larger questions being related to here.

**Response:**

We appreciate the reviewer for raising this comment. We agree that changes in this nine-day can't directly impact the nutrient released during the ablation period of the

following year, thus it is insufficient to address such a big question. We have altered the goal of the present study, which now attempts to fill a missing but important knowledge gap in nutrient and microbial community changes immediately after a snowfall. We believe this information is utterly needed as this freshly fallen snow will be buried during the next snowfall, which will be responsible for the stratified snowpack structure, and will collectively influence the nutrient release during the coming ablation period. We have amended the introduction to emphasize the value and importance of carrying out a short temporal scale investigation on bacterial community and nutrients.

[Amended manuscript \(Lines 50-63\):](#)

Several studies investigated the dynamics of nutrient and bacterial changes in supraglacial snow during the ablation period. Larose et al. (2013a) revealed that the form of nitrogen varied as a function of time in supraglacial snow during a two-month field study at the Svalbard, Norway and fluctuations in microbial community structure have been reported with the relative abundance of fungi and bacteria (such as Bacteroidetes and Proteobacteria) increased and decreased, relatively. Seasonal shifts in snowpack bacterial communities have also been reported in the mountain snow in Japan, rapid microbial growth was observed with increasing snow temperature and meltwater content (Segawa et al., 2005). However, the results of these studies are likely the consequence of these several precipitation events due to the long period of time. During precipitation, a new snow layer forms above the previous ones, which is responsible for the stratified snowpack structure. These different snow layers have distinct physical and chemical characteristics and their age also differed substantially (Lazzaro et al., 2015). Thus, the microbial process across the aged snowpack could be complex, whereas focusing on supraglacial snow from a single snowfall event could provide unique insights into the bacterial and nutrient dynamics. Hell et al. (2013) reported bacterial community structure changes during the ablation period across five days in the high Arctic, while the bacterial and nutrient dynamics during the snow accumulation period remain elusive.

And (Lines 83-99)

Glacier melting increases the discharge of microorganisms and nutrients in meltwater into downstream aquatic ecosystems (Kohler et al., 2020), which substantially impacts the bacterial community and biogeochemical processes (Liu et al., 2021). Thus, it is crucial to understand the transformation processes of the bacterial community and nutrients in the supraglacial snow. Several studies have investigated the nutrient and bacterial community changes in supraglacial snow across the winter (Brooks et al., 1998; Liu et al., 2006), but the bacterial and nutrient dynamics of freshly fallen snow have been largely overlooked. These short temporal changes will influence the following post-depositional processes after it is buried by the next snowfall, and will ultimately determine the physicochemical properties of the stratified snow in the following year. In the present study, we investigated the bacterial community and snow physiochemical property changes in the surface and subsurface supraglacial snow during a nine-day period after a single snowfall event at the Dunde Glacier on the northeast of the Tibetan Plateau. We aimed to answer the following key questions: 1) do the bacterial community and nutrient changes in a short temporal scale, 2) do the bacterial communities in different snow layers exhibit similar community temporal changes, and 3) are the temporal changes in the surface and subsurface snow related to environmental filtering, biotic interactions, or both?

**Question 16.** Line 80: You have matched the same vertical distribution profile of Carey et al. 2016 (i.e. upper 15 cm and 15 – 30cm) – can you justify why these layer depths were appropriate for a completely different snowpack with presumably different physiochemical conditions? i.e. do you have any density measurements etc to quantify your layer characteristics?. Snowpacks can have numerous different layer profiles dependent on precipitation and subsequent metamorphism processes.

**Response:**

We thank for this comment. Unfortunately, we didn't measure the density of the two snow layers. This snowpack was fresh snow from one snowfall event, and we didn't see a clear physical difference between the two layers at least within the nine days

period, thus if there were any metamorphism changes, they would have happened after our sampling started. Each snow pit was approximately 30 cm deep at the beginning of sampling. To get enough DNA for sequencing, we divided the snowpack equally into surface and subsurface layers (approximately 15 cm deep for each layer), according to Carey (2016). We amended the method section to explain the sampling design.

[Amended manuscript \(method section\) \(Lines 105-113\):](#)

No supraglacial snow was observed on the glacier surface on the 10<sup>th</sup> of October when first arrived at the camp. Snowfall started on the 18<sup>th</sup> and ended on the 23<sup>rd</sup> of October. Sampling was conducted over a nine-day period after the snowfall stopped on a flat 5 m × 3 m small area to reduce the impact of sample heterogeneity due to spatial variations. Snow samples were collected on the 24<sup>th</sup>, 25<sup>th</sup>, 26<sup>th</sup>, 27<sup>th</sup>, and 29<sup>th</sup> of October, and the 2<sup>nd</sup> November (which are referred as day 1, 2, 3, 4, 6, and 9) until the next snowfall started. This enabled us to follow the development of bacterial communities and the chemical environment through time after deposition. The ambient air temperature at the sampling period is averaged -8 °C (data available through the European Centre for Medium-Range Weather Forecasts, Supplementary Fig. S2), no snow melting was observed over the nine days.

**Question 17.** Line 82/83: just to clarify – a total of n = 3 surface and subsurface snow samples, and n = 3 surface and subsurface samples for aqueous geochemistry were taken on each sampling day?

**Response:**

This is correct, we collected three samples each for the surface and subsurface snow, and each sample was divided into two portions, 100 ml of snow was used for physiochemical analyses and the remaining 3L was used for DNA extraction.

[Original manuscript:](#)

For each snow pit, the top 1 cm in contact with the air was removed using a sterile spoon to avoid contamination, and then surface and subsurface snow were collected using a sterilized Teflon shovel into 3L separate, sterile sampling bags.

[Amended manuscript \(Lines 118-122\):](#)

For each snow pit, the top 1 cm in contact with the air was removed using a sterile spoon to avoid contamination, and then surface and subsurface snow were collected using a sterilized Teflon shovel into 3 L sterile sampling bags separately. Approximately 100 mL were used for physicochemical analyses, whereas the rest was used for DNA extraction.

**Question 18.** A nice level of detail throughout for DNA extraction, amplification, sequencing, sequence processing and identification and subsequent analyses.

**Response:**

Thank you for the comment.

**Results:**

**Question 19.** Section 3.1. Can you clarify the nitrogen data in figure 1 please? It appears that the total nitrogen (presumably inorganic + organic N fractions) is much lower than the corresponding nitrate concentration. It states in the methods that different methods were used for TN, NH<sub>4</sub> and NO<sub>3</sub> quantification. How do you account for this ~4-fold lower TN concentration than NO<sub>3</sub> concentration for example? Unless the TN data reflect just the organic fraction after subtraction of inorganics? This isn't clear. Given the focus on N in the manuscript this needs to be clear.

**Response:**

We are extremely grateful for the reviewer to point this out. As the reviewer's comment below suggested, the range of the standard curve is much smaller than the total nitrogen we reported, and this is most likely to cause the underestimation of total nitrogen. Therefore, we have removed the results regarding total nitrogen throughout the manuscript, and this does not significantly impact our conclusion, i.e., nitrate and ammonium concentrations covaried with the microbial diversity and community structure in subsurface snow.

**Question 20.** Looking at Supp Fig. S2, the standard curve for TN goes up to ~0.4 mg/L but you are presenting data up to ~ 1.25 mg/L in the manuscript, well above this level.

Have you calculated TN concentration from peak areas much greater than the standard curve bounds you have performed? Also, please quantify the relationships on Figure S2 with linear regression, not correlation.

**Response:**

We appreciate the reviewer for raising this concern. We agree that the total nitrogen has been underestimated due to the incorrect standard curve range, and the results regarding the total nitrogen have been removed completely. We have performed the linear regression using the “lm” function in R, the results are presented in the supplementary figure.

[Amended manuscript \(Supplementary Fig S3\):](#)

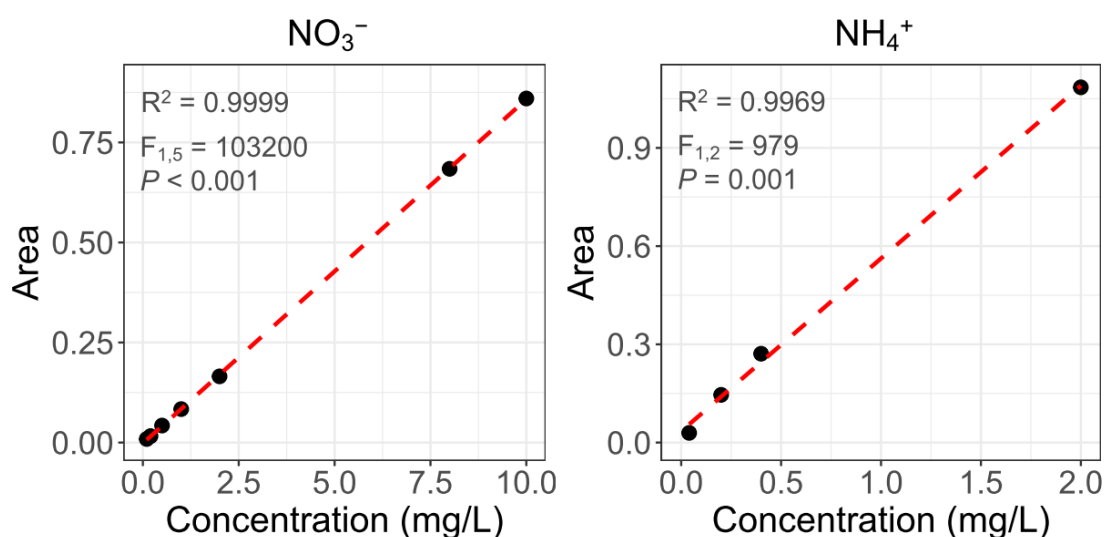

Fig S3 Standard curve of  $\text{NO}_3^-$ ,  $\text{NH}_4^+$  ions. The x-axis is the concentration of the standard sample; the y-axis represents the peak area. Significance is based on linear regression.

**Question 21.** The ‘significant increases’ in  $\text{NO}_3$  and  $\text{NH}_4$  through time are rather small in magnitude – please include the actual R value in the text to illustrate the effect size of this relationship.

**Response:**

We thank for the comment. We have rewritten the sentence, added the R-value in the manuscript, and also performed linear regression analyses.

[Original manuscript:](#)



The concentration of  $\text{NO}_3^-$ , and  $\text{NH}_4^+$  ions in the surface layer significantly increased with time (Fig 1b). In comparison, the concentrations of TN,  $\text{NO}_3^-$ , and  $\text{NH}_4^+$  in the subsurface layer significantly decreased with time.

[Amended manuscript \(Lines 224-228\):](#)

The concentration of  $\text{NO}_3^-$  and  $\text{NH}_4^+$  ions in the surface snow increased with time ( $F_{1,16} = 5.97$ ,  $P = 0.027$ ,  $R^2 = 0.27$  and  $F_{1,16} = 8.58$ ,  $P = 0.010$ ,  $R^2 = 0.35$ , respectively, Fig. 1b). In comparison, they decreased with time in the subsurface snow ( $F_{1,16} = 40.66$ ,  $P < 0.001$ ,  $R^2 = 0.72$  and  $F_{1,16} = 50.74$ ,  $P < 0.001$ ,  $R^2 = 0.76$ , respectively). Other environmental factors exhibited no significant changes with time.

**Question 22.** How can you be certain the concentration of N has changed through time given that you are not repeat sampling in the same locations? The methods detail that new snow pits were dug each sampling day (as would be expected). How can you be certain that the variability ‘through time’ in your data, does not simply reflect variability in space, i.e. heterogeneity in snowpack N content across your sampling area?

**Response:**

We thank the reviewer for this comment. We believe that spatial heterogeneity is unavoidable in a field study. Nevertheless, the sampling strategy minimized the possibility that the pattern observed is solely due to the “variability in space”. Firstly, the sampling area was on a relatively small flat area, which could minimize the impact of spatial variations. Secondly, the site where three snowpits were dug every day was randomly picked to avoid the pattern caused by spatial variation.

### **Section 3.2.**

**Question 23.** Again, I find the presentation and reliance on correlations between diversity indices / relative abundance and time / Geochem data to be a bit misleading. These correlations are rather weak but the phraseology presents them as ‘significant’ changes. Can you reword presentation of correlations to reflect their actual strength, e.g. “a negative correlation was apparent between Shannon and Chao1 indices and time in the subsurface layer”.

**Response:**

We appreciate the reviewer for raising this concern. We rephrased the sentences and performed additional linear regression analyses.

Original manuscript:

The bacterial Shannon and Chao1 indices in the surface layer were  $5.61 \pm 0.39$  and  $744 \pm 199$ , respectively, which were not significantly different from those in the subsurface layer ( $5.52 \pm 0.68$  and  $705 \pm 269$ , respectively) (Fig 2a). In the surface layer, the Shannon and Chao1 indices did not change significantly with time (Pearson correlation;  $r = 0.15$ ,  $P = 0.553$ ;  $r = -0.02$ ,  $P = 0.939$ , respectively, Fig 2b). In contrast, both the Shannon and Chao1 indices both significantly decreased with time in the subsurface layer (Pearson correlation;  $r = 0.63$ ,  $P = 0.003$ ;  $r = 0.56$ ,  $P = 0.009$ , respectively). In the surface layer, the Shannon indices positively correlated with the concentration of DOC (Pearson correlation;  $r = 0.48$ ,  $P = 0.04$ , Fig 3a). In the subsurface layer, the Shannon and Chao1 indices were positively correlated with the concentration of TN,  $\text{NO}_3^-$  and  $\text{NH}_4^+$  (Pearson correlation;  $P < 0.05$ , Fig 3b and Supplementary Fig S4).

Amended manuscript (Lines 257-272):

The bacterial Shannon and Chao1 indices in the surface snow were  $5.61 \pm 0.39$  and  $744 \pm 199$ , respectively, which were not significantly different from those in the subsurface layer ( $5.52 \pm 0.68$  and  $705 \pm 269$ , respectively) ( $P = 0.81$  and  $0.57$ , respectively) (Fig. 3a). In the surface snow, the Shannon and Chao1 indices were similar across the nine days ( $F_{1,16} = 0.37$ ,  $P = 0.553$ ,  $R^2 = 0.02$  and  $F_{1,16} = 0.01$ ,  $P = 0.939$ ,  $R^2 = 0.001$ , respectively; Fig. 3b). In comparison, negative associations were observed in both Shannon and Chao1 indices with time in the subsurface snow ( $F_{1,16} = 12.33$ ,  $P = 0.003$ ,  $R^2 = 0.44$  and  $F_{1,16} = 8.73$ ,  $P = 0.009$ ,  $R^2 = 0.35$ , respectively). In the surface layer, the positive correlations of Shannon and Chao1 indices with the DOC and sodium ions were apparent ( $F_{1,16} = 4.90$ ,  $P = 0.042$ ,  $R^2 = 0.23$  and  $F_{1,16} = 4.91$ ,  $P = 0.042$ ,  $R^2 = 0.24$ , respectively; Fig. 4a,b). In the subsurface snow, the positive correlations of Shannon and Chao1 indices with the concentrations of  $\text{NO}_3^-$  and  $\text{NH}_4^+$  were apparent (Shannon diversity:  $F_{1,16} = 9.13$ ,  $P = 0.008$ ,  $R^2 = 0.36$  and  $F_{1,16} = 5.17$ ,  $P = 0.037$ ,  $R^2 = 0.24$ , respectively; Chao1 index:  $F_{1,16} = 8.60$ ,  $P = 0.009$ ,  $R^2 = 0.36$  and  $F_{1,16} = 5.32$ ,  $P = 0.035$ ,

$R^2 = 0.25$ , respectively; Fig. 4cd). This is consistent with the random forest analysis results, which identified the concentrations of  $\text{NO}_3^-$  and  $\text{NH}_4^+$  as the significant determinants of bacterial Shannon diversity in the subsurface layer (Supplementary Fig. S8).

**Question 24.** Can multiple linear regressions be tested here to account for differences in diversity taking into account multiple factors simultaneously rather than simplistic single variable correlations?

**Response:**

We thank for the constructive suggestion. We have performed additional Random Forest analysis to investigate the influence of environmental factors, which takes the influence of multiple variables into account. This result is consistent with the correlation analysis results, which identified the concentration of nitrate and ammonium as the significant determinants of bacterial diversity in the subsurface snow layer. We added this result in the Result section and supplementary as Figure S9.

[Amended manuscript \(Lines 270-272\):](#)

This is consistent with the random forest analysis results, which identified the concentrations of  $\text{NO}_3^-$  and  $\text{NH}_4^+$  as the significant determinants of bacterial Shannon diversity in the subsurface layer (Supplementary Fig. S8).

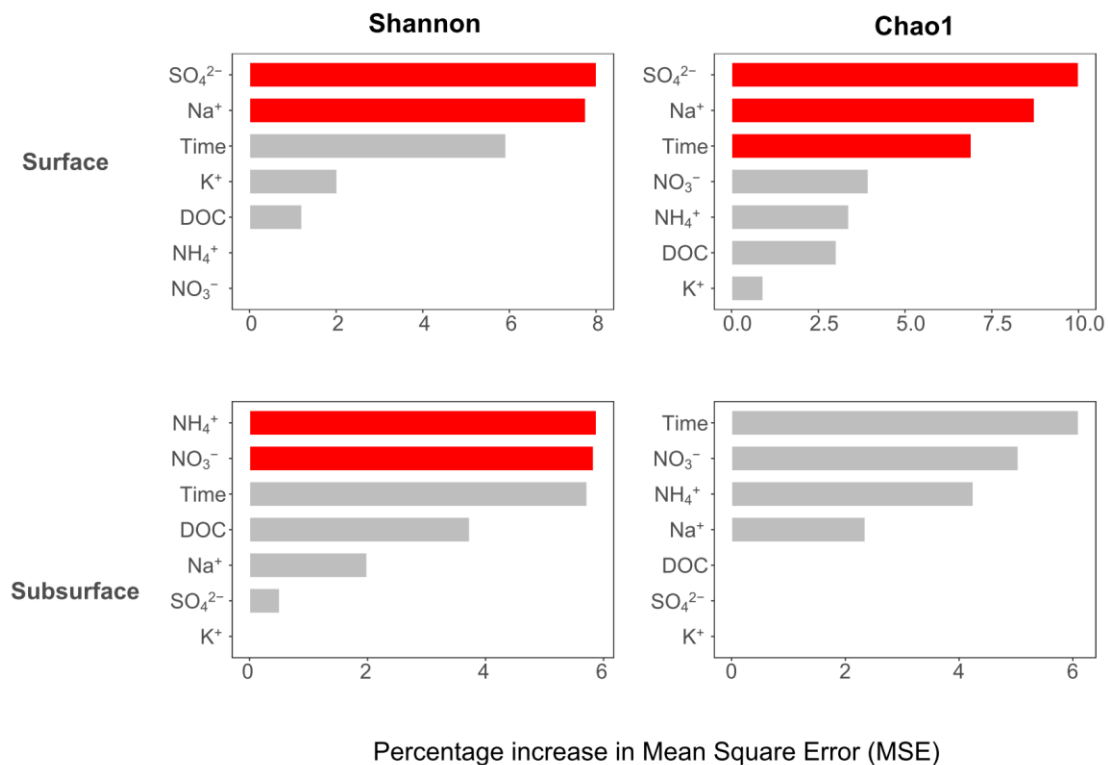

Fig S8 Random Forest analysis results showing the contribution of environmental factors on the bacterial Shannon and Chao1 indices in the surface and subsurface snow. (Red bars represent significant indicators at  $P < 0.05$ , grey bars represent non-significant indicators).

**Question 25.** Please move the second paragraph on the actual community composition to the start of this section, which should then be followed by comparisons to other datasets.

**Response:**

We thank for the suggestion, and we have moved the second paragraph to the start of this section. We added the comparison in the discussion part.

[Amended manuscript \(Lines 320-323\):](#)

The surface and subsurface snow were both dominated by Alphaproteobacteria, Actinobacteria, Cyanobacteria, Gammaproteobacteria, and Bacteroidetes (Fig. 2). Despite differences in sampling season, the bacterial taxa detected were consistent with previous studies on snow in the Arctic and Antarctic (Larose et al., 2010; Carpenter et al., 2000; Amato et al., 2007; Lopatina et al., 2013; Møller et al., 2013).

**Question 26.** Looking at Figure 4 there appears no real distinction between surface and sub-surface community composition. I wonder whether this relates to an arbitrary 15 cm distinction between surface and subsurface snow, rather than basing this on clearly defined snow layers?

**Response:**

We appreciate the reviewer to raise this concern. Figure 4 is the community composition at the phylum level, temporal changes were observed in certain phyla, namely the Alphaproteobacteria, Gammaproteobacteria, Firmicutes, Cyanobacteria, and Deinococcus-Thermus in the surface layer, and the Alphaproteobacteria, Firmicutes, Cyanobacteria, and Chloroflexi in the subsurface layer. This is largely consistent with those observed by Hell et al., 2013<sup>1</sup> that only a limited number of bacterial lineages exhibited changes across a short temporal scale in supraglacial snow.

1. Hell, K., Edwards, A., Zarsky, J. et al. The dynamic bacterial communities of a melting High Arctic glacier snowpack. ISME J 7, 1814–1826 (2013)

**Question 27.** Same comments as above for the phraseology surrounding the data in figure S6 – there is a very large reliance here on simplistic correlations.

**Response:**

We appreciate the reviewer for raising this concern. We have performed additional linear regression analyses, and rephrased the sentence to reflect this.

Original manuscript:

In the surface layer, the relative abundances of Alphaproteobacteria, Gammaproteobacteria, and Firmicutes significantly decreased with time (Supplementary Fig S6), while those of Cyanobacteria and Deinococcus-Thermus significantly increased (all  $P < 0.05$ ).

Amended manuscript (Lines 238-256):

The surface and subsurface snow were both dominated by Alphaproteobacteria, Actinobacteria, Cyanobacteria, Gammaproteobacteria, Bacteroidetes, Firmicutes, Chloroflexi, Gemmatimonadetes, Planctomycetes, Acidobacteria, Deltaproteobacteria, and Deinococcus-Thermus (Fig. 2). The relative abundance of most of these phyla was

not significantly differed in the two snow layers, except the Gemmatimonadetes, Planctomycetes, and Acidobacteria, which exhibited significantly higher relative abundance in the surface layer than in the subsurface layer (all  $P < 0.05$ , Wilcoxon rank-sum test; Supplementary Fig. S5). In the surface layer, negative associations were apparent in the relative abundances and ASV number of Alphaproteobacteria, Gammaproteobacteria, and Firmicutes with time ( $F_{1,16} = 6.97$ ,  $P = 0.018$ ,  $R^2 = 0.30$ ;  $F_{1,16} = 23.8$ ,  $P < 0.001$ ,  $R^2 = 0.60$ , and  $F_{1,16} = 22.28$ ,  $P < 0.001$ ,  $R^2 = 0.58$  in relative abundance;  $F_{1,16} = 7.56$ ,  $P = 0.014$ ,  $R^2 = 0.32$ ;  $F_{1,16} = 27.12$ ,  $P < 0.001$ ,  $R^2 = 0.63$ , and  $F_{1,16} = 16.68$ ,  $P = 0.001$ ,  $R^2 = 0.51$  in ASV number, respectively), while positive associations were apparent in the relative abundances and ASV number of Cyanobacteria and Deinococcus-Thermus with time ( $F_{1,16} = 6.94$ ,  $P = 0.018$ ,  $R^2 = 0.30$  and  $F_{1,16} = 13.10$ ,  $P = 0.002$ ,  $R^2 = 0.45$  in relative abundance;  $F_{1,16} = 3.42$ ,  $P = 0.083$ ,  $R^2 = 0.18$  and  $F_{1,16} = 4.07$ ,  $P = 0.061$ ,  $R^2 = 0.20$  in ASV number, respectively; Supplementary Fig. S6). In the subsurface layer, negative associations were apparent in the relative abundance and ASV number of Alphaproteobacteria and Firmicutes with time ( $F_{1,16} = 15.17$ ,  $P = 0.001$ ,  $R^2 = 0.49$  and  $F_{1,16} = 15.43$ ,  $P = 0.001$ ,  $R^2 = 0.49$  in relative abundance;  $F_{1,16} = 18.98$ ,  $P = 0.083$ ,  $R^2 = 0.54$  and  $F_{1,16} = 15.17$ ,  $P = 0.001$ ,  $R^2 = 0.53$  in ASV number, respectively, Supplementary Fig. S7), while positive associations were apparent in the relative abundance and ASV number of Cyanobacteria and Chloroflexi with time ( $F_{1,16} = 5.62$ ,  $P = 0.031$ ,  $R^2 = 0.26$  and  $F_{1,16} = 12.81$ ,  $P = 0.003$ ,  $R^2 = 0.44$  in relative abundance;  $F_{1,16} = 5.34$ ,  $P = 0.034$ ,  $R^2 = 0.25$  and  $F_{1,16} = 14.49$ ,  $P = 0.002$ ,  $R^2 = 0.47$  in ASV number, respectively).

### Section 3.3.

**Question 28.** Similar comments to previous sections, in that much is made of relatively weak analysis outcomes (e.g. PCoA axis 1 = 16.31% of variation, and PCoA axis 2 = 11.06%), numerous correlations are employed that whilst they have ‘significant’ p-values often have very low r values, and nitrogen cycling gene content relative abundance that is inferred from 16S data rather than being measured on the samples. Given the lack of causative relationships established in these results care needs to be

taken on their interpretation regarding larger scale processes.

**Response:**

We appreciate the reviewer for raising this comment. We have added the regression analyses to evaluate the changes in bacterial diversity and environmental factors across the nine days. We agree that functions inferred from the 16S rRNA gene do not reflect the actual gene abundance changes, additional metagenomic and transcriptomic analyses would be required. This major drawback is discussed in the manuscript. We have also modified the discussion sections and the manuscript now focuses on the temporal patterns of bacterial diversity and environmental factors, and then carefully suggested that the nitrogen changes could be associated with the bacterial diversity changes. The results of functional gene predictions are only discussed to provide an alternative source of nitrogen in the surface snow and an alternative emission route in the subsurface snow.

Amended results:

On physicochemical properties (Lines 224-228):

The concentration of  $\text{NO}_3^-$  and  $\text{NH}_4^+$  ions in the surface snow increased with time ( $F_{1,16} = 5.97$ ,  $P = 0.027$ ,  $R^2 = 0.27$  and  $F_{1,16} = 8.58$ ,  $P = 0.010$ ,  $R^2 = 0.35$ , respectively, Fig. 1b). In comparison, they decreased with time in the subsurface snow ( $F_{1,16} = 40.66$ ,  $P < 0.001$ ,  $R^2 = 0.72$  and  $F_{1,16} = 50.74$ ,  $P < 0.001$ ,  $R^2 = 0.76$ , respectively). Other environmental factors exhibited no significant changes with time.

On taxonomy composition (Lines 243-256):

In the surface layer, negative associations were apparent in the relative abundances and ASV number of Alphaproteobacteria, Gammaproteobacteria, and Firmicutes with time ( $F_{1,16} = 6.97$ ,  $P = 0.018$ ,  $R^2 = 0.30$ ;  $F_{1,16} = 23.8$ ,  $P < 0.001$ ,  $R^2 = 0.60$ , and  $F_{1,16} = 22.28$ ,  $P < 0.001$ ,  $R^2 = 0.58$  in relative abundance;  $F_{1,16} = 7.56$ ,  $P = 0.014$ ,  $R^2 = 0.32$ ;  $F_{1,16} = 27.12$ ,  $P < 0.001$ ,  $R^2 = 0.63$ , and  $F_{1,16} = 16.68$ ,  $P = 0.001$ ,  $R^2 = 0.51$  in ASV number, respectively), while positive associations were apparent in the relative abundances and ASV number of Cyanobacteria and Deinococcus-Thermus with time ( $F_{1,16} = 6.94$ ,  $P = 0.018$ ,  $R^2 = 0.30$  and  $F_{1,16} = 13.10$ ,  $P = 0.002$ ,  $R^2 = 0.45$  in relative abundance;  $F_{1,16} =$

3.42,  $P = 0.083$ ,  $R^2 = 0.18$  and  $F_{1,16} = 4.07$ ,  $P = 0.061$ ,  $R^2 = 0.20$  in ASV number, respectively; Supplementary Fig. S6). In the subsurface layer, negative associations were apparent in the relative abundance and ASV number of Alphaproteobacteria and Firmicutes with time ( $F_{1,16} = 15.17$ ,  $P = 0.001$ ,  $R^2 = 0.49$  and  $F_{1,16} = 15.43$ ,  $P = 0.001$ ,  $R^2 = 0.49$  in relative abundance;  $F_{1,16} = 18.98$ ,  $P = 0.083$ ,  $R^2 = 0.54$  and  $F_{1,16} = 15.17$ ,  $P = 0.001$ ,  $R^2 = 0.53$  in ASV number, respectively, Supplementary Fig. S7), while positive associations were apparent in the relative abundance and ASV number of Cyanobacteria and Chloroflexi with time ( $F_{1,16} = 5.62$ ,  $P = 0.031$ ,  $R^2 = 0.26$  and  $F_{1,16} = 12.81$ ,  $P = 0.003$ ,  $R^2 = 0.44$  in relative abundance;  $F_{1,16} = 5.34$ ,  $P = 0.034$ ,  $R^2 = 0.25$  and  $F_{1,16} = 14.49$ ,  $P = 0.002$ ,  $R^2 = 0.47$  in ASV number, respectively).

#### On bacterial diversity (Lines 257-270):

The bacterial Shannon and Chao1 indices in the surface snow were  $5.61 \pm 0.39$  and  $744 \pm 199$ , respectively, which were not significantly different from those in the subsurface layer ( $5.52 \pm 0.68$  and  $705 \pm 269$ , respectively) ( $P = 0.81$  and  $0.57$ , respectively) (Fig. 3a). In the surface snow, the Shannon and Chao1 indices were similar across the nine days ( $F_{1,16} = 0.37$ ,  $P = 0.553$ ,  $R^2 = 0.02$  and  $F_{1,16} = 0.01$ ,  $P = 0.939$ ,  $R^2 = 0.001$ , respectively; Fig. 3b). In comparison, negative associations were observed in both Shannon and Chao1 indices with time in the subsurface snow ( $F_{1,16} = 12.33$ ,  $P = 0.003$ ,  $R^2 = 0.44$  and  $F_{1,16} = 8.73$ ,  $P = 0.009$ ,  $R^2 = 0.35$ , respectively). In the surface layer, the positive correlations of Shannon and Chao1 indices with the DOC and sodium ions were apparent ( $F_{1,16} = 4.90$ ,  $P = 0.042$ ,  $R^2 = 0.23$  and  $F_{1,16} = 4.91$ ,  $P = 0.042$ ,  $R^2 = 0.24$ , respectively; Fig. 4a,b). In the subsurface snow, the positive correlations of Shannon and Chao1 indices with the concentrations of  $\text{NO}_3^-$  and  $\text{NH}_4^+$  were apparent (Shannon diversity:  $F_{1,16} = 9.13$ ,  $P = 0.008$ ,  $R^2 = 0.36$  and  $F_{1,16} = 5.17$ ,  $P = 0.037$ ,  $R^2 = 0.24$ , respectively; Chao1 index:  $F_{1,16} = 8.60$ ,  $P = 0.009$ ,  $R^2 = 0.36$  and  $F_{1,16} = 5.32$ ,  $P = 0.035$ ,  $R^2 = 0.25$ , respectively; Fig. 4cd).

#### Amended discussion (Lines 364-386):

Both ammonium and nitrate concentrations increased in the surface snow (Fig. 1). The



increase in ammonium is traditionally explained by biogenic emissions due to local vegetal and animal sources (Filippa et al., 2010), while the increase in nitrate has been largely attributed to atmospheric deposition (Björkman et al., 2014). Nitrogen deposition occurs at a rate of  $282 \text{ kg N km}^{-2} \text{ yr}^{-1}$  in the region of our investigation (Lü and Tian, 2007), this equals  $0.19 \text{ mg N}$  for the  $0.5 \text{ m} \times 0.5 \text{ m}$  area sampled each day (assuming nitrogen deposition occurred evenly across the year). If further assuming the deposited nitrogen only affects the surface snow (i.e., the top 15 cm as defined in the present study), the daily nitrogen increase is estimated to be  $0.084 \text{ mg N L}^{-1}$ . This is lower than the slope of total nitrogen increase observed in the surface snow of the present study ( $0.21 \text{ mg N L}^{-1} \text{ day}^{-1}$ ). Thus, either the atmospheric nitrogen deposition has more than doubled, or bacterial nitrogen fixation could be an alternative source of nitrogen input (Telling et al., 2011). The latter is supported by the biosynthesis of nitrogen-containing compounds by bacteria with increased dissolved organic nitrogen reported in the Antarctic surface snow (Antony et al., 2017). The contribution of bacterial nitrogen fixation is further supported by the increase in the relative abundance of Cyanobacteria and the predicted abundance of *nifH* gene in surface snow (Supplementary Fig. S6 and Fig. S12). The exact nitrogen fixation rate was not quantified in the present study, but the results suggest that microbial nitrogen fixation could be an overlooked source of nitrogen in Tibetan glacier snow, further transcriptomic and nitrogen-isotope analyses may provide further evidence on the microbial activity in nitrogen fixation.

## **Discussion:**

**Question 29.** Generally I find the direction of the discussion immediately and dominantly toward nitrogen dynamics to be concerning given that i) the nitrogen dataset is very modest (triplicate samples on a total of 7 days all within a single 9 day period) and ii) there remain a few concerns that I have detailed above about the validity of this dataset in terms of both analytics and sampling design. Much of the discussion text around the impact of nitrogen on the bacterial community is rather vague and is mainly conjecture. There are inappropriate references to non-snow studies (e.g. sub-glacial

works) and there is no attempt to place the findings into the wider context in regard to when/where samples were taken. For example, all samples are taken over a 9-day period in relatively recently deposited snow long before any melt processes are likely to begin – how representative are these data of what is actually happening in the snowpack on timescales longer than a week or so? Or how might they contrast to a melting snowpack? How do they fit with snowpack metamorphism processes?

**Response:**

We thank for the comment. We agree that we don't have solid evidence that the changes in bacterial diversity, community structure, and potential functions are caused by nitrogen. Instead, this conclusion was inferred from the correlation relationship. We have rewritten the discussion and focus primarily on the bacterial community and soil physiochemical property changes observed, and link the two very carefully. We have added a paragraph to discuss the implication of our short temporal scale study on the dynamics of bacterial and physicochemical properties changes in supraglacial snow. We have also modified to introduction and discussion sections to change the focus of the manuscript to the bacterial and nutrient dynamics across a short temporal scale, which has been largely omitted in the literature.

[Amended manuscript](#)

[Introduction \(Lines 50-63\):](#)

Several studies investigated the dynamics of nutrient and bacterial changes in supraglacial snow during the ablation period. Larose et al. (2013a) revealed that the form of nitrogen varied as a function of time in supraglacial snow during a two-month field study at the Svalbard, Norway and fluctuations in microbial community structure have been reported with the relative abundance of fungi and bacteria (such as Bacteroidetes and Proteobacteria) increased and decreased, relatively. Seasonal shifts in snowpack bacterial communities have also been reported in the mountain snow in Japan, rapid microbial growth was observed with increasing snow temperature and meltwater content (Segawa et al., 2005). However, the results of these studies are likely the consequence of these several precipitation events due to the long period of time. During precipitation, a new snow layer forms above the previous ones, which is

responsible for the stratified snowpack structure. These different snow layers have distinct physical and chemical characteristics and their age also differed substantially (Lazzaro et al., 2015). Thus, the microbial process across the aged snowpack could be complex, whereas focusing on supraglacial snow from a single snowfall event could provide unique insights into the bacterial and nutrient dynamics. Hell et al. (2013) reported bacterial community structure changes during the ablation period across five days in the high Arctic, while the bacterial and nutrient dynamics during the snow accumulation period remain elusive.

#### And (Lines 83-91):

Glacier melting increases the discharge of microorganisms and nutrients in meltwater into downstream aquatic ecosystems (Kohler et al., 2020), which substantially impacts the bacterial community and biogeochemical processes (Liu et al., 2021). Thus, it is crucial to understand the transformation processes of the bacterial community and nutrients in the supraglacial snow. Several studies have investigated the nutrient and bacterial community changes in supraglacial snow across the winter (Brooks et al., 1998; Liu et al., 2006), but the bacterial and nutrient dynamics of freshly fallen snow have been largely overlooked. These short temporal changes will influence the following post-depositional processes after it is buried by the next snowfall, and will ultimately determine the physicochemical properties of the stratified snow in the following year.

#### Discussion (Lines 320-340):

The surface and subsurface snow were both dominated by Alphaproteobacteria, Actinobacteria, Cyanobacteria, Gammaproteobacteria, and Bacteroidetes (Fig. 2). Despite differences in sampling season, the bacterial taxa detected were consistent with previous studies on snow in the Arctic and Antarctic (Larose et al., 2010; Carpenter et al., 2000; Amato et al., 2007; Lopatina et al., 2013; Møller et al., 2013). Bacterial richness and diversity remained consistent throughout the nine days in the surface snow layer, while they exhibited a reduction trend in the subsurface snow layer (Fig. 3b). This

indicates that the microbiome in the subsurface snow may be subjected to greater environmental filtering than those in the surface snow (Xiang et al., 2009). Among all environmental factors measured, nitrate and ammonium were the only measured environmental factors that changed across the nine days. The nitrate and ammonium concentrations both exhibited an  $R^2$  value of greater than 0.7 and reduced with time, therefore indicating a consumption process (Fig. 1b). Despite the  $R^2$  value being weak, both nitrate and ammonium concentrations covaried with bacteria richness and diversity in subsurface snow, which is not observed in the surface snow (Fig. 4). Furthermore, random forest analysis also identified nitrate and ammonium to be the dominant driver of bacteria Shannon diversity in the subsurface layer (Supplementary Fig. S8). Thus, these results suggest that nitrate and ammonium could play a more important role in influencing bacterial diversity in subsurface snow than that in surface snow. Nitrogen is an essential nutrient for microbial growth and plays important role in controlling microbial diversity and ecosystem productivity (Vitousek et al., 2002; Xia et al., 2008; Sun et al., 2014). The positive associations between nitrogen concentration and alpha diversity indices have been typically inferred as nitrogen limitation (Telling et al., 2011). Thus, these results hint that nitrogen limitation could occur in subsurface snow and influence bacteria diversity. In comparison, the surface layer is unlikely to be subjected to nitrogen-limitation as evidenced by the lack of association between nitrogen and bacterial diversity (Telling et al., 2012). This is consistent with previous studies in the Greenland ice sheet, where nitrate additions to surface ice did not alter the cryoconite community cell abundance and 16S rRNA gene-based community composition (Cameron et al., 2017).

[And \(Lines 351-360\):](#)

Our results suggest that both bacteria and snow physiochemical properties experience rapid changes across the nine days during the snow deposition period in the Tibetan glacier investigated here. Traditionally, supraglacial snow is recognized as a cold oligotrophic environment with a very slow metabolism rate (Quesada and Vincent, 2012; Marshall and Chalmers, 1997), but increasing evidence has suggested that

bacterial community changes can occur on a short temporal scale. For example, Hell et al. (2013) reported changes in the dominant bacterial phylum Proteobacteria across five days and active bacterial metabolism has been observed in the Greenland Ice Sheet supraglacial ice (Nicholes et al., 2019). In addition, active bacteria affiliated with Proteobacteria have been identified in the Antarctic (Lopatina et al., 2013) and Arctic (Holland et al., 2020) snow at temperatures below zero degrees, therefore supporting the present study that bacterial community changes in nine days could be possible. This indicates that supraglacial snow can harbour an active bacterial community and interact with the nutrient transformation process.

**Question 30.** I believe that the first two sections as they stand could be reduced down into one short discussion paragraph on potential links between the bacterial community and nitrogen dynamics, but that the breadth of the dataset presented does not warrant the drawing of such definite conclusions on the controlling role of nitrogen within the snowpack sampled. The latter third paragraph is better and could form the basis for a new discussion of the dataset. The authors should provide a more general discussion into their datasets if this work is to be accepted for final publication. They should focus on what they can report rather than drawing grand conclusions from a relatively limited study and they should attempt to justify what insight their samples can provide given the timing and location of their sampling regime.

**Response:**

We thank the reviewer for the constructive suggestion. We have rewritten the second part of the discussion, which now discusses the potential sources of nitrogen (including nitrate and ammonium) in the surface snow, and their emission route in the subsurface snow. Traditionally, nitrogen deposition is responsible for the increase of nitrogen in surface snow, and here we calculated the theoretical input of nitrogen and showed the gap between this theoretical value and the observed value, and then propose bacterial nitrogen fixation could fill the gap. We also added a paragraph to discuss the implication of the present study, which showed a dynamic bacterial community in freshly fallen snow and the potential influence on nutrient transformation in supraglacial snow.

[Amended manuscript \(Lines 364-406\):](#)

Both ammonium and nitrate concentrations increased in the surface snow (Fig. 1). The increase in ammonium is traditionally explained by biogenic emissions due to local vegetal and animal sources (Filippa et al., 2010), while the increase in nitrate has been largely attributed to atmospheric deposition (Björkman et al., 2014). Nitrogen deposition occurs at a rate of  $282 \text{ kg N km}^{-2} \text{ yr}^{-1}$  in the region of our investigation (Lü and Tian, 2007), this equals  $0.19 \text{ mg N}$  for the  $0.5 \text{ m} \times 0.5 \text{ m}$  area sampled each day (assuming nitrogen deposition occurred evenly across the year). If further assuming the deposited nitrogen only affects the surface snow (i.e., the top 15 cm as defined in the present study), the daily nitrogen increase is estimated to be  $0.084 \text{ mg N L}^{-1}$ . This is lower than the slope of total nitrogen increase observed in the surface snow of the present study ( $0.21 \text{ mg N L}^{-1} \text{ day}^{-1}$ ). Thus, either the atmospheric nitrogen deposition has more than doubled, or bacterial nitrogen fixation could be an alternative source of nitrogen input (Telling et al., 2011). The latter is supported by the biosynthesis of nitrogen-containing compounds by bacteria with increased dissolved organic nitrogen reported in the Antarctic surface snow (Antony et al., 2017). The contribution of bacterial nitrogen fixation is further supported by the increase in the relative abundance of Cyanobacteria and the predicted abundance of *nifH* gene in surface snow (Supplementary Fig. S6 and Fig. S12). The exact nitrogen fixation rate was not quantified in the present study, but the results suggest that microbial nitrogen fixation could be an overlooked source of nitrogen in Tibetan glacier snow, further transcriptomic and nitrogen-isotope analyses may provide further evidence on the microbial activity in nitrogen fixation.

In contrast with the surface layer, nitrogen concentrations (nitrate and ammonium) significantly decreased in the subsurface snow with time (Fig. 1). In a snow reactive nitrogen oxides ( $\text{NO}_y$ ) survey in Greenland,  $\text{NO}_y$  flux was reported to exit snow in 52 out of 112 measurements, and the magnitude cannot be explained by the photolysis of nitrate alone (Dibb et al., 1998). Furthermore, the short sampling period of the present study does not allow rapid photolysis to occur (Larose et al., 2013b), therefore collectively suggesting an alternative source of  $\text{NO}_y$  emission could exist. The

denitrification process could contribute to nitrogen consumption, which is evidenced by the increase of predicted genes associated with denitrification processes (*narG*; Supplementary Fig. S12) (Telling et al., 2011; Zhang et al., 2020). This is consistent with the high relative abundance of denitrification-related genes being detected in the snowpack of Spitsbergen Island of Svalbard, Norway (Larose et al., 2013a). Despite the oxygen level in the subsurface snow was not measured, the occurrence of anaerobic denitrification reactions in subsurface snow has been reported in Arctic snowpacks (Larose et al., 2013a). Furthermore, Poniecka et al. (2018) showed that cryoconite microorganisms can generate an anoxic zone 2 mm below the sediment surface within an hour. Thus, anaerobic pockets in subsurface snow at 15-30 cm deep could exist, which allows denitrification reactions to occur. Further metatranscriptomic analyses targeting the genes associated with nitrogen cycling are required to further confirm the distinct nitrogen transformation processes between the surface and subsurface layers.
